# Supplementary material for: Adaptive Resistance to Dual BRAF/MEK Inhibition in BRAF-Driven Tumors through Autocrine FGFR Pathway Activation
Source: Oxford University Press journal article supplement (doi:10.1158/1078-0432.ccr-18-2779), 2019-09-12
Supplement: 10780432ccr182779-sup-207711_3_supp_5720620_pwc4fh.xlsx [file 10780432ccr182779-sup-207711_3_supp_5720620_pwc4fh.xlsx]

## Sheet: Sheet1
Cell line	MOA	Drug class	Molecule(s)	IC50	IC50Lo	IC50Hi	Parental/Resistant + Combo	Resistant/Resistant + Combo
A-375 Parental	Bcl-2 inhibitor	Apoptosis	ABT-199	3	3	3	1	1
A-375 VCR	Bcl-2 inhibitor	Apoptosis	ABT-199	3	3	3
A-375 VCR MEK + BRAF	Bcl-2 inhibitor	Apoptosis	ABT-199	3	3	3
A-375 Parental	Bcl-2 Bcl-xL inhibitor;IRE1 inhibitor	Apoptosis;Kinase inhibitor	ABT737;G00590559	29.0056	25.7611	36.2085	1.45997	2.875
A-375 VCR	Bcl-2 Bcl-xL inhibitor;IRE1 inhibitor	Apoptosis;Kinase inhibitor	ABT737;G00590559	57.1261	41.3334	> 67.5
A-375 VCR MEK + BRAF	Bcl-2 Bcl-xL inhibitor;IRE1 inhibitor	Apoptosis;Kinase inhibitor	ABT737;G00590559	19.8672	10.6385	29.5288
A-375 Parental	Bcl-2 Bcl-xL inhibitor;IRE1 inhibitor	Apoptosis;Kinase inhibitor	ABT737;G00590559	32.4715	29.4454	36.3812	1.35648	2.819
A-375 VCR	Bcl-2 Bcl-xL inhibitor;IRE1 inhibitor	Apoptosis;Kinase inhibitor	ABT737;G00590559	67.5	> 67.5	> 67.5
A-375 VCR MEK + BRAF	Bcl-2 Bcl-xL inhibitor;IRE1 inhibitor	Apoptosis;Kinase inhibitor	ABT737;G00590559	23.938	10.7463	34.387
A-375 Parental	Microtubule stabilizer	Chemo	Docetaxel	0.0157047	0.0144018	0.0176954	0.508441	9.71
A-375 VCR	Microtubule stabilizer	Chemo	Docetaxel	0.3	> 0.3	> 0.3
A-375 VCR MEK + BRAF	Microtubule stabilizer	Chemo	Docetaxel	0.030888	0.0286289	0.0332271
A-375 Parental	Microtubule stabilizer;NA	Chemo;NA	Docetaxel;G02787235	> 0.27	> 0.27	> 0.27	1	1
A-375 VCR	Microtubule stabilizer;NA	Chemo;NA	Docetaxel;G02787235	> 0.27	> 0.27	> 0.27
A-375 VCR MEK + BRAF	Microtubule stabilizer;NA	Chemo;NA	Docetaxel;G02787235	> 0.27	> 0.27	> 0.27
A-375 Parental	Idealalisib	PI3Kdelta	G00038989	> 10	> 10	> 10	1	1
A-375 VCR	Idealalisib	PI3Kdelta	G00038989	> 10	> 10	> 10
A-375 VCR MEK + BRAF	Idealalisib	PI3Kdelta	G00038989	> 10	> 10	> 10
A-375 Parental	GDC0853+Idealalisib	PI3Kdelta + BTK	G00038989;G02599853	> 10;10	> 10;10	> 10;10	1	1
A-375 VCR	GDC0853+Idealalisib	PI3Kdelta + BTK	G00038989;G02599853	> 10;10	> 10;10	> 10;10
A-375 VCR MEK + BRAF	GDC0853+Idealalisib	PI3Kdelta + BTK	G00038989;G02599853	> 10;10	> 10;10	> 10;10
A-375 Parental	Vemurafenib	BRAF	G00044364	1.80523	1.7339	1.8795	0.180523	1
A-375 VCR	Vemurafenib	BRAF	G00044364	> 10	> 10	> 10
A-375 VCR MEK + BRAF	Vemurafenib	BRAF	G00044364	> 10	> 10	> 10
A-375 Parental	IRE1 inhibitor	Kinase inhibitor	G00590559	33.3826	30.5246	39.9938	1.14244	2.56
A-375 VCR	IRE1 inhibitor	Kinase inhibitor	G00590559	> 75	> 75	> 75
A-375 VCR MEK + BRAF	IRE1 inhibitor	Kinase inhibitor	G00590559	29.2205	18.2067	37.2821
A-375 Parental	NAMPT	Metabolism	G02594618;Nicotinic Acid	> 0.9	> 0.9	> 0.9	1	1
A-375 VCR	NAMPT	Metabolism	G02594618;Nicotinic Acid	> 0.9	> 0.9	> 0.9
A-375 VCR MEK + BRAF	NAMPT	Metabolism	G02594618;Nicotinic Acid	> 0.9	> 0.9	> 0.9
A-375 Parental	BTK	NA	G02599853	> 10	> 10	> 10	1	1
A-375 VCR	BTK	NA	G02599853	> 10	> 10	> 10
A-375 VCR MEK + BRAF	BTK	NA	G02599853	> 10	> 10	> 10
A-375 Parental	Tankyrase	NA	G02778631	> 10	> 10	> 10	1	1
A-375 VCR	Tankyrase	NA	G02778631	> 10	> 10	> 10
A-375 VCR MEK + BRAF	Tankyrase	NA	G02778631	> 10	> 10	> 10
A-375 Parental	PI3K	Kinase inhibitor	GDC-0032	5.92482	5.17052	6.59935	8.07083	13.62
A-375 VCR	PI3K	Kinase inhibitor	GDC-0032	10	> 10	> 10
A-375 VCR MEK + BRAF	PI3K	Kinase inhibitor	GDC-0032	0.734103	0.378753	1.2262
A-375 Parental	MEK inhibitor	Kinase inhibitor	GDC-0973	0.0222162	0.0184343	0.0278171	0.0091986	4.14
A-375 VCR	MEK inhibitor	Kinase inhibitor	GDC-0973	> 10	6.26499	> 10
A-375 VCR MEK + BRAF	MEK inhibitor	Kinase inhibitor	GDC-0973	2.41517	1.60885	3.58566
A-375 Parental	ERK inhibitor	Kinase inhibitor	GDC-0994	0.274201	0.224648	0.338529	0.0274	1
A-375 VCR	ERK inhibitor	Kinase inhibitor	GDC-0994	> 10	> 10	> 10
A-375 VCR MEK + BRAF	ERK inhibitor	Kinase inhibitor	GDC-0994	> 10	> 10	> 10
A-375 Parental	NA	NA	Paclitaxel	0.055544	0.0487441	0.0631779	0.49622	26.8
A-375 VCR	NA	NA	Paclitaxel	> 3	> 3	> 3
A-375 VCR MEK + BRAF	NA	NA	Paclitaxel	0.111934	0.105782	0.123611
A-375 Parental	Aurora Kinase	NA;NA	Paclitaxel;G02787235	> 2.7	> 2.7	> 2.7	1	1
A-375 VCR	Aurora Kinase	NA;NA	Paclitaxel;G02787235	> 2.7	> 2.7	> 2.7
A-375 VCR MEK + BRAF	Aurora Kinase	NA;NA	Paclitaxel;G02787235	> 2.7	> 2.7	> 2.7
A-375 Parental	CHK1 inhibitor	NA	G00587330	0.749585	0.674849	0.822769	2.63959	3.78
A-375 VCR	CHK1 inhibitor	NA	G00587330	1.07362	0.36958	> 10
A-375 VCR MEK + BRAF	CHK1 inhibitor	NA	G00587330	0.283978	0.254324	0.317821
A-375 Parental	PI3Kdelta	NA	G00588286	> 10	> 10	> 10	1	1
A-375 VCR	PI3Kdelta	NA	G00588286	> 10	> 10	> 10
A-375 VCR MEK + BRAF	PI3Kdelta	NA	G00588286	> 10	6.8507	> 10
A-375 Parental	BRPF1 inhibitor	Epigenetic	G00676181	> 20	> 20	> 20	1	1
A-375 VCR	BRPF1 inhibitor	Epigenetic	G00676181	> 20	> 20	> 20
A-375 VCR MEK + BRAF	BRPF1 inhibitor	Epigenetic	G00676181	> 20	15.9194	> 20
A-375 Parental	Trametinib	NA	G02442104	0.00657426	0.00473967	0.0100014	0.000657426	1
A-375 VCR	Trametinib	NA	G02442104	> 10	> 10	> 10
A-375 VCR MEK + BRAF	Trametinib	NA	G02442104	> 10	3.31929	> 10
A-375 Parental	BTK inhibitor	NA	G02448614	> 10	> 10	> 10	1	1
A-375 VCR	BTK inhibitor	NA	G02448614	> 10	> 10	> 10
A-375 VCR MEK + BRAF	BTK inhibitor	NA	G02448614	> 10	5.95674	> 10
A-375 Parental	PI3Kgamma/delta	NA	G02452804	> 10	> 10	> 10	1	1
A-375 VCR	PI3Kgamma/delta	NA	G02452804	> 10	> 10	> 10
A-375 VCR MEK + BRAF	PI3Kgamma/delta	NA	G02452804	> 10	> 10	> 10
A-375 Parental	NAMPT duplicate (lower conc)	metabolism	G02594618	0.0149257	0.0133641	0.017215	0.77919	1.27
A-375 VCR	NAMPT	metabolism	G02594618	0.0244349	0.020132	0.0296611
A-375 VCR MEK + BRAF	NAMPT	metabolism	G02594618	0.0191554	0.0152295	0.0338049
A-375 Parental	PERK inhibitor	NA	G02663326	> 10	> 10	> 10	1	1
A-375 VCR	PERK inhibitor	NA	G02663326	> 10	> 10	> 10
A-375 VCR MEK + BRAF	PERK inhibitor	NA	G02663326	> 10	4.60169	> 10
A-375 Parental	ERK	NA	G02665104	0.168329	0.124566	0.216397	0.0168329	1
A-375 VCR	ERK	NA	G02665104	> 10	> 10	> 10
A-375 VCR MEK + BRAF	ERK	NA	G02665104	> 10	> 10	> 10
A-375 Parental	Avila BTK	NA	G02671049	7.12418	6.23578	8.14082	4.44073	6.23
A-375 VCR	Avila BTK	NA	G02671049	> 10	> 10	> 10
A-375 VCR MEK + BRAF	Avila BTK	NA	G02671049	1.60428	1.14368	3.48595
A-375 Parental	MLL-Menin	Epigenetic	G02692633	9.24351	7.22498	> 100	0.0924351	1
A-375 VCR	MLL-Menin	Epigenetic	G02692633	> 100	> 100	> 100
A-375 VCR MEK + BRAF	MLL-Menin	Epigenetic	G02692633	> 100	> 100	> 100
A-375 Parental	MLL-Menin inactive inhibitor	Epigenetic	G02692634	20.7066	8.35645	49.424	0.325262	1.62
A-375 VCR	MLL-Menin inactive inhibitor	Epigenetic	G02692634	> 100	> 100	> 100
A-375 VCR MEK + BRAF	MLL-Menin inactive inhibitor	Epigenetic	G02692634	61.4889	50.7863	90.9213
A-375 Parental	ERK	NA	G02692670	0.535232	0.40463	0.710148	0.0552183	1.031
A-375 VCR	ERK	NA	G02692670	> 10	> 10	> 10
A-375 VCR MEK + BRAF	ERK	NA	G02692670	9.69302	4.93862	> 10
A-375 Parental	BRPF1 inhibitor	Epigenetic	G02770994	> 20	> 20	> 20	1	1
A-375 VCR	BRPF1 inhibitor	Epigenetic	G02770994	> 20	> 20	> 20
A-375 VCR MEK + BRAF	BRPF1 inhibitor	Epigenetic	G02770994	> 20	> 20	> 20
A-375 Parental	BRD9	Epigenetic	G02774322	> 20	> 20	> 20	1	1
A-375 VCR	BRD9	Epigenetic	G02774322	> 20	> 20	> 20
A-375 VCR MEK + BRAF	BRD9	Epigenetic	G02774322	> 20	19.5976	> 20
A-375 Parental	BRD9	Epigenetic	G02774446	> 20	> 20	> 20	1	1
A-375 VCR	BRD9	Epigenetic	G02774446	> 20	> 20	> 20
A-375 VCR MEK + BRAF	BRD9	Epigenetic	G02774446	> 20	> 20	> 20
A-375 Parental	BRD9	Epigenetic	G02774452	> 20	> 20	> 20	1	1
A-375 VCR	BRD9	Epigenetic	G02774452	> 20	> 20	> 20
A-375 VCR MEK + BRAF	BRD9	Epigenetic	G02774452	> 20	> 20	> 20
A-375 Parental	ibrutinib	BTK inhibitor	Kinase inhibitor	> 10	> 10	> 10	2.43309	2.43
A-375 VCR	ibrutinib	BTK inhibitor	Kinase inhibitor	> 10	> 10	> 10
A-375 VCR MEK + BRAF	ibrutinib	BTK inhibitor	Kinase inhibitor	4.11897	3.13861	> 10
A-375 Parental	CDK8 inhibitor	Kinase inhibitor	G02777263	> 40	> 40	> 40	1	1
A-375 VCR	CDK8 inhibitor	Kinase inhibitor	G02777263	> 40	> 40	> 40
A-375 VCR MEK + BRAF	CDK8 inhibitor	Kinase inhibitor	G02777263	> 40	> 40	> 40
A-375 Parental	MLL-Menin inhibitor	Epigenetic	G02778169	> 100	> 100	> 100	1	1
A-375 VCR	MLL-Menin inhibitor	Epigenetic	G02778169	> 100	> 100	> 100
A-375 VCR MEK + BRAF	MLL-Menin inhibitor	Epigenetic	G02778169	> 100	> 100	> 100
A-375 Parental	RAF inhibitor	Kinase inhibitor	G02778407	0.00744752	0.00526625	0.0137116	0.000744752	1
A-375 VCR	RAF inhibitor	Kinase inhibitor	G02778407	> 10	> 10	> 10
A-375 VCR MEK + BRAF	RAF inhibitor	Kinase inhibitor	G02778407	> 10	> 10	> 10
A-375 Parental	NA	NA	NVP-BGJ398	> 10	> 10	> 10	1	1
A-375 VCR	NA	NA	NVP-BGJ398	> 10	> 10	> 10
A-375 VCR MEK + BRAF	NA	NA	NVP-BGJ398	> 10	> 10	> 10
A-375 Parental	DNA methyltransferase inhibitor	Epigenetic	5-azacytidine (Vidaza)	2.20974	1.80552	2.5371	0.143826	1.3
A-375 VCR	DNA methyltransferase inhibitor	Epigenetic	5-azacytidine (Vidaza)	> 20	> 20	> 20
A-375 VCR MEK + BRAF	DNA methyltransferase inhibitor	Epigenetic	5-azacytidine (Vidaza)	15.3639	10.3986	> 20
A-375 Parental	Alkylating agent	Chemo	Carboplatin	> 100	> 100	> 100	1	1
A-375 VCR	Alkylating agent	Chemo	Carboplatin	> 100	> 100	> 100
A-375 VCR MEK + BRAF	Alkylating agent	Chemo	Carboplatin	> 100	> 100	> 100
A-375 Parental	Type 2 topoisomerase inhibitor	Chemo	Doxorubicin	0.431259	0.338487	0.62905	0.539137	1.3298
A-375 VCR	Type 2 topoisomerase inhibitor	Chemo	Doxorubicin	1.06376	0.772013	1.44893
A-375 VCR MEK + BRAF	Type 2 topoisomerase inhibitor	Chemo	Doxorubicin	0.799905	0.770427	0.851266
A-375 Parental	ERBB2 inhibitor	NA	G00028527	> 20	19.6706	> 20	1	1
A-375 VCR	ERBB2 inhibitor	NA	G00028527	> 20	> 20	> 20
A-375 VCR MEK + BRAF	ERBB2 inhibitor	NA	G00028527	> 20	16.3528	> 20
A-375 Parental	NA	NA	G02309860	0.298292	0.273908	0.334996	0.923863	2.24
A-375 VCR	NA	NA	G02309860	0.724191	0.407632	1.04005
A-375 VCR MEK + BRAF	NA	NA	G02309860	0.322875	0.299926	0.36618
A-375 Parental	HDAC1/2 inhibitor	Epigenetic	G02447946	> 20	> 20	> 20	1	1
A-375 VCR	HDAC1/2 inhibitor	Epigenetic	G02447946	> 20	> 20	> 20
A-375 VCR MEK + BRAF	HDAC1/2 inhibitor	Epigenetic	G02447946	> 20	> 20	> 20
A-375 Parental	HDAC3 inhibitor	Epigenetic	G02579877	> 10	> 10	> 10	1	1
A-375 VCR	HDAC3 inhibitor	Epigenetic	G02579877	> 10	> 10	> 10
A-375 VCR MEK + BRAF	HDAC3 inhibitor	Epigenetic	G02579877	> 10	> 10	> 10
A-375 Parental	Irinotecan	Topoisomerase	G02629427	0.878519	0.783297	0.971784	0.804763	1.64
A-375 VCR	Irinotecan	Topoisomerase	G02629427	1.79443	1.06159	4.59189
A-375 VCR MEK + BRAF	Irinotecan	Topoisomerase	G02629427	1.09165	0.9974	1.23626
A-375 Parental	MAP4K4 inhibitor	Kinase inhibitor	G02664495	> 10	> 10	> 10	1	1
A-375 VCR	MAP4K4 inhibitor	Kinase inhibitor	G02664495	> 10	> 10	> 10
A-375 VCR MEK + BRAF	MAP4K4 inhibitor	Kinase inhibitor	G02664495	> 10	> 10	> 10
A-375 Parental	LDHA/B inhibitor	Metabolism	G02771674	5.44914	4.48183	6.34622	0.108983	1
A-375 VCR	LDHA/B inhibitor	Metabolism	G02771674	> 50	> 50	> 50
A-375 VCR MEK + BRAF	LDHA/B inhibitor	Metabolism	G02771674	> 50	44.1546	> 50
A-375 Parental	NA	NA	G02782682	4.44721	3.01314	5.09436	1.25322	3.93
A-375 VCR	NA	NA	G02782682	13.961	13.3616	14.5586
A-375 VCR MEK + BRAF	NA	NA	G02782682	3.54863	2.72555	4.65706
A-375 Parental	CHK1 inhibitor	Kinase inhibitor	GDC-0575	2.66641	1.77173	5.67245	4.09251	3.44
A-375 VCR	CHK1 inhibitor	Kinase inhibitor	GDC-0575	2.24722	1.05208	> 10
A-375 VCR MEK + BRAF	CHK1 inhibitor	Kinase inhibitor	GDC-0575	0.651535	0.560978	0.828348
A-375 Parental	Anti-metabolite	Chemo	Gemcitabine	0.0045257	0.00409694	0.00536973	0.485033	2.93
A-375 VCR	Anti-metabolite	Chemo	Gemcitabine	0.0273629	0.0109659	> 1
A-375 VCR MEK + BRAF	Anti-metabolite	Chemo	Gemcitabine	0.00933069	0.00530578	0.0256388
A-375 Parental	BET inhibitor	Epigenetic	JQ1	0.51685	0.426316	0.682655	1.96042	3.79
A-375 VCR	BET inhibitor	Epigenetic	JQ1	> 1	> 1	> 1
A-375 VCR MEK + BRAF	BET inhibitor	Epigenetic	JQ1	0.263643	0.180379	0.435632
A-375 Parental	HDAC inhibitor	Epigenetic	MS-275	> 0.1	> 0.1	> 0.1	1	1
A-375 VCR	HDAC inhibitor	Epigenetic	MS-275	> 0.1	> 0.1	> 0.1
A-375 VCR MEK + BRAF	HDAC inhibitor	Epigenetic	MS-275	> 0.1	> 0.1	> 0.1
A-375 Parental	HDAC inhibitor	Epigenetic	SAHA	1.71956	1.62489	1.83312	1.51651	2
A-375 VCR	HDAC inhibitor	Epigenetic	SAHA	2.27803	1.64868	3.67803
A-375 VCR MEK + BRAF	HDAC inhibitor	Epigenetic	SAHA	1.1339	0.750792	1.33037
A-375 Parental	EGFR-T790M selective inhibitor	Kinase inhibitor	T790M -selective EGFR inhibitor	19.051	12.7662	> 20	0.975	1
A-375 VCR	EGFR-T790M selective inhibitor	Kinase inhibitor	T790M -selective EGFR inhibitor	> 20	> 20	> 20
A-375 VCR MEK + BRAF	EGFR-T790M selective inhibitor	Kinase inhibitor	T790M -selective EGFR inhibitor	> 20	15.1097	> 20
A-375 Parental	EGFR inhibitor	Kinase inhibitor	Tarceva	> 10	> 10	> 10	1	1
A-375 VCR	EGFR inhibitor	Kinase inhibitor	Tarceva	> 10	> 10	> 10
A-375 VCR MEK + BRAF	EGFR inhibitor	Kinase inhibitor	Tarceva	> 10	> 10	> 10
A-375 Parental	Microtubule stabilizer	Chemo	Taxol	0.022122	0.016663	0.0353322	0.22	1
A-375 VCR	Microtubule stabilizer	Chemo	Taxol	> 0.1	> 0.1	> 0.1
A-375 VCR MEK + BRAF	Microtubule stabilizer	Chemo	Taxol	> 0.1	0.0983462	> 0.1
A-375 Parental	Inhibitor of sarco/ER Ca++ ATPase (ER stress)	Cellular physiology	Thapsigargin	0.121695	0.0606805	0.167234	0.857143	7.14
A-375 VCR	Inhibitor of sarco/ER Ca++ ATPase (ER stress)	Cellular physiology	Thapsigargin	> 1	0.551415	> 1
A-375 VCR MEK + BRAF	Inhibitor of sarco/ER Ca++ ATPase (ER stress)	Cellular physiology	Thapsigargin	0.145905	0.129174	0.17037
A-375 Parental	MET inhibitor	Kinase inhibitor	Tivatinib / ARQ197	0.442562	0.353606	0.535654	0.269939	12.26
A-375 VCR	MET inhibitor	Kinase inhibitor	Tivatinib / ARQ197	> 20	> 20	> 20
A-375 VCR MEK + BRAF	MET inhibitor	Kinase inhibitor	Tivatinib / ARQ197	1.6316	1.20755	2.07733
A-375 Parental	MT poison	Chemo	Vincristine	0.0926387	0.0584815	> 0.1	0.926387	1
A-375 VCR	MT poison	Chemo	Vincristine	> 0.1	> 0.1	> 0.1
A-375 VCR MEK + BRAF	MT poison	Chemo	Vincristine	> 0.1	0.0655783	> 0.1
A-375 Parental	p90 RSK inhibitor	Kinase inhibitor	BI-D1870	> 10	> 10	> 10	1	1
A-375 VCR	p90 RSK inhibitor	Kinase inhibitor	BI-D1870	> 10	> 10	> 10
A-375 VCR MEK + BRAF	p90 RSK inhibitor	Kinase inhibitor	BI-D1870	> 10	> 10	> 10
A-375 Parental	p38alpha inhibitor	Kinase inhibitor	BIRB-796	> 20	> 20	> 20	1	1
A-375 VCR	p38alpha inhibitor	Kinase inhibitor	BIRB-796	> 20	> 20	> 20
A-375 VCR MEK + BRAF	p38alpha inhibitor	Kinase inhibitor	BIRB-796	> 20	6.24284	> 20
A-375 Parental	Proteasome inhibitor	Cellular physiology	bortezomib	0.0904466	0.0565232	0.129592	1.38269	0.92
A-375 VCR	Proteasome inhibitor	Cellular physiology	bortezomib	0.0603128	0.0425246	0.116831
A-375 VCR MEK + BRAF	Proteasome inhibitor	Cellular physiology	bortezomib	0.0654134	0.0634198	0.0675611
A-375 Parental	PDK1 inhibitor	Kinase inhibitor	BX912	4.55747	4.16879	5.0862	1.8034	7.68
A-375 VCR	PDK1 inhibitor	Kinase inhibitor	BX912	19.426	11.7505	> 20
A-375 VCR MEK + BRAF	PDK1 inhibitor	Kinase inhibitor	BX912	2.52715	1.87902	3.41127
A-375 Parental	microtubule inhibitor	ADC	DM1	0.00217239	0.00155707	0.00332441	0.924589	42.5
A-375 VCR	microtubule inhibitor	ADC	DM1	> 0.1	> 0.1	> 0.1
A-375 VCR MEK + BRAF	microtubule inhibitor	ADC	DM1	0.00234958	0.00157851	0.00420694
A-375 Parental	PI3K inhibitor_alpha-selective	Kinase inhibitor	G01525326	> 20	> 20	> 20	15.2672	15.26
A-375 VCR	PI3K inhibitor_alpha-selective	Kinase inhibitor	G01525326	> 20	> 20	> 20
A-375 VCR MEK + BRAF	PI3K inhibitor_alpha-selective	Kinase inhibitor	G01525326	1.31172	1.00925	1.74462
A-375 Parental	LSD1	Epigenetic	G02786240	> 10	> 10	> 10	1	1
A-375 VCR	LSD1	Epigenetic	G02786240	> 10	> 10	> 10
A-375 VCR MEK + BRAF	LSD1	Epigenetic	G02786240	> 10	> 10	> 10
A-375 Parental	LSD1 inhibitor	Epigenetic	G02786867	> 10	> 10	> 10	1	1
A-375 VCR	LSD1 inhibitor	Epigenetic	G02786867	> 10	> 10	> 10
A-375 VCR MEK + BRAF	LSD1 inhibitor	Epigenetic	G02786867	> 10	> 10	> 10
A-375 Parental	Akt inhibitor	Kinase inhibitor	GDC-0068	> 20	> 20	> 20	3.14465	3.144
A-375 VCR	Akt inhibitor	Kinase inhibitor	GDC-0068	> 20	> 20	> 20
A-375 VCR MEK + BRAF	Akt inhibitor	Kinase inhibitor	GDC-0068	6.36715	4.70172	10.2456
A-375 Parental	PI3K inhibitor_brain penetrant	Kinase inhibitor	GDC-0084	1.28164	1.22823	1.33738	1.21	2.23
A-375 VCR	PI3K inhibitor_brain penetrant	Kinase inhibitor	GDC-0084	2.36698	1.74984	> 20
A-375 VCR MEK + BRAF	PI3K inhibitor_brain penetrant	Kinase inhibitor	GDC-0084	1.06355	0.848474	1.345
A-375 Parental	MEK inhibitor	Kinase inhibitor	GDC-0623	0.0368044	0.0207554	0.0767124	0.00368044	1
A-375 VCR	MEK inhibitor	Kinase inhibitor	GDC-0623	> 10	> 10	> 10
A-375 VCR MEK + BRAF	MEK inhibitor	Kinase inhibitor	GDC-0623	> 10	> 10	> 10
A-375 Parental	PI3K inhibitor	Kinase inhibitor	GDC-0941	> 10	> 10	> 10	1	1
A-375 VCR	PI3K inhibitor	Kinase inhibitor	GDC-0941	> 10	> 10	> 10
A-375 VCR MEK + BRAF	PI3K inhibitor	Kinase inhibitor	GDC-0941	> 10	> 10	> 10
A-375 Parental	PI3K mTOR dual inhibitor	Kinase inhibitor	GDC-0980	0.600234	0.55778	0.646656	2.29581	5.85
A-375 VCR	PI3K mTOR dual inhibitor	Kinase inhibitor	GDC-0980	1.52935	0.688403	7.39014
A-375 VCR MEK + BRAF	PI3K mTOR dual inhibitor	Kinase inhibitor	GDC-0980	0.261448	0.163819	1.11781
A-375 Parental	microtubule inhibitor	ADC	MMAE	0.00493653	0.0040826	0.00607813	1.65775	33.58
A-375 VCR	microtubule inhibitor	ADC	MMAE	> 0.1	> 0.1	> 0.1
A-375 VCR MEK + BRAF	microtubule inhibitor	ADC	MMAE	0.00297786	0.00224514	0.0042234
A-375 Parental	ATP Synthase Inhibitor	Metabolism	Oligomycin	> 10	> 10	> 10	2.68817	2.688
A-375 VCR	ATP Synthase Inhibitor	Metabolism	Oligomycin	> 10	> 10	> 10
A-375 VCR MEK + BRAF	ATP Synthase Inhibitor	Metabolism	Oligomycin	3.72952	0.105312	> 10
A-375 Parental	MEK inhibitor	Kinase inhibitor	PD901	0.00524554	0.00427751	0.00644728	0.000262277	1
A-375 VCR	MEK inhibitor	Kinase inhibitor	PD901	> 20	> 20	> 20
A-375 VCR MEK + BRAF	MEK inhibitor	Kinase inhibitor	PD901	> 20	18.6393	> 20
A-375 Parental	ALK, ROS1, MET inhibitor	Kinase inhibitor	PF-2341066	> 1	> 1	> 1	1	1
A-375 VCR	ALK, ROS1, MET inhibitor	Kinase inhibitor	PF-2341066	> 1	> 1	> 1
A-375 VCR MEK + BRAF	ALK, ROS1, MET inhibitor	Kinase inhibitor	PF-2341066	> 1	0.694474	> 1
A-375 Parental	DNA/RNA synthesis and TopoII inhibitor	ADC	PNU-159682	2.27e-05	1.87e-05	2.86e-05	0.412	1.65
A-375 VCR	DNA/RNA synthesis and TopoII inhibitor	ADC	PNU-159682	4.6e-05	2.77e-05	7.48e-05
A-375 VCR MEK + BRAF	DNA/RNA synthesis and TopoII inhibitor	ADC	PNU-159682	5.34e-05	3.23e-05	8.02e-05
A-375 Parental	mTOR inhibitor	Other	Rapamycin	> 0.1	0.0991423	> 0.1	1	1
A-375 VCR	mTOR inhibitor	Other	Rapamycin	> 0.1	> 0.1	> 0.1
A-375 VCR MEK + BRAF	mTOR inhibitor	Other	Rapamycin	> 0.1	> 0.1	> 0.1
A-375 Parental	p38 MAPK inhibitor	Kinase inhibitor	SB202190	> 20	> 20	> 20	1	1
A-375 VCR	p38 MAPK inhibitor	Kinase inhibitor	SB202190	> 20	> 20	> 20
A-375 VCR MEK + BRAF	p38 MAPK inhibitor	Kinase inhibitor	SB202190	> 20	> 20	> 20
A-375 Parental	DNA damaging	ADC	SG-2507	0.000507774	0.000269088	0.000797644	1.27981	2.04
A-375 VCR	DNA damaging	ADC	SG-2507	0.000810366	0.000386618	0.00192657
A-375 VCR MEK + BRAF	DNA damaging	ADC	SG-2507	0.000396757	0.000210223	0.000737868
A-375 Parental	DNA damaging	ADC	SN34994	2.9e-05	1.64e-05	5.05e-05	0.411932	1.65
A-375 VCR	DNA damaging	ADC	SN34994	0.000116045	5.39e-05	0.000237488
A-375 VCR MEK + BRAF	DNA damaging	ADC	SN34994	7.04e-05	4.43e-05	0.000140487
A-375 Parental	SHP2 inhibitor	Phosphatase inhibitor	SHP099	>10	>10	>10	1.9	1.9
A-375 VCR	SHP2 inhibitor	Phosphatase inhibitor	SHP099	>10	>10	>10
A-375 VCR MEK + BRAF	SHP2 inhibitor	Phosphatase inhibitor	SHP099	5.253	4.268	5.315
A-375 Parental	STAT3 inhibitor	Other	Rocelitinib	>10	>10	>10	1	1
A-375 VCR	STAT3 inhibitor	Other	Rocelitinib	>10	>10	>10
A-375 VCR MEK + BRAF	STAT3 inhibitor	Other	Rocelitinib	>10	>10	>10
A-375 Parental	BCR-Abl, VEGF, FGFR	Kinase inhibitor	Ponatinib	0.591	0.551	0.617	12.9478	21.6089
A-375 VCR	BCR-Abl, VEGF, FGFR	Kinase inhibitor	Ponatinib	0.994	0.98	1.003
A-375 VCR MEK + BRAF	BCR-Abl, VEGF, FGFR	Kinase inhibitor	Ponatinib	0.046	0.042	0.046
A-375 Parental	A-375 Parental	Apoptosis	Navitoclax	7.693	7.573	7.928	0.7771	0.8815
A-375 VCR	A-375 VCR	Apoptosis	Navitoclax	8.726	8.005	9.109
A-375 VCR MEK + BRAF	A-375 VCR MEK + BRAF	Apoptosis	Navitoclax	9.899	9.851	9.963
A-375 Parental	Src Inhibitor	Kinase inhibitor	Saracatinib	>10	>10	>10	27.4725	27.4725
A-375 VCR	Src Inhibitor	Kinase inhibitor	Saracatinib	>10	>10	>10
A-375 VCR MEK + BRAF	Src Inhibitor	Kinase inhibitor	Saracatinib	0.364	0.348	0.392
A-375 Parental	Src Inhibitor	Kinase inhibitor	Dasatinib	2.694	2.67	3.251	22.2645	24.7273
A-375 VCR	Src Inhibitor	Kinase inhibitor	Dasatinib	2.992	2.834	3.2
A-375 VCR MEK + BRAF	Src Inhibitor	Kinase inhibitor	Dasatinib	0.121	0.114	0.132
